# Supplementary material for: Zwitterionic polymer coated sorafenib-loaded Fe3O4 composite nanoparticles induced ferroptosis for cancer therapy
Source: Royal Society of Chemistry journal article supplement (doi:10.1039/d2tb01242a), 2022-01-01
Supplement: d2tb01242a1.pdf [file d2tb01242a1.pdf]

## Supplementary Information

### **Zwitterionic polymer coated sorafenib-loaded Fe<sub>3</sub>O<sub>4</sub> composite nanoparticles induced ferroptosis for cancer therapy**

*Jingbo Lin,<sup>a</sup> Jiaxin Zhang,<sup>a</sup> Kuang Wang,<sup>a</sup> Shengdi Guo<sup>a</sup> and Wuli Yang<sup>\*a</sup>*

*<sup>a</sup> State Key Laboratory of Molecular Engineering of Polymers and Department of Macromolecular Science, Fudan University, 220 Handan Road, Shanghai 200433, P.R. China. Email: wlyang@fudan.edu.cn.*

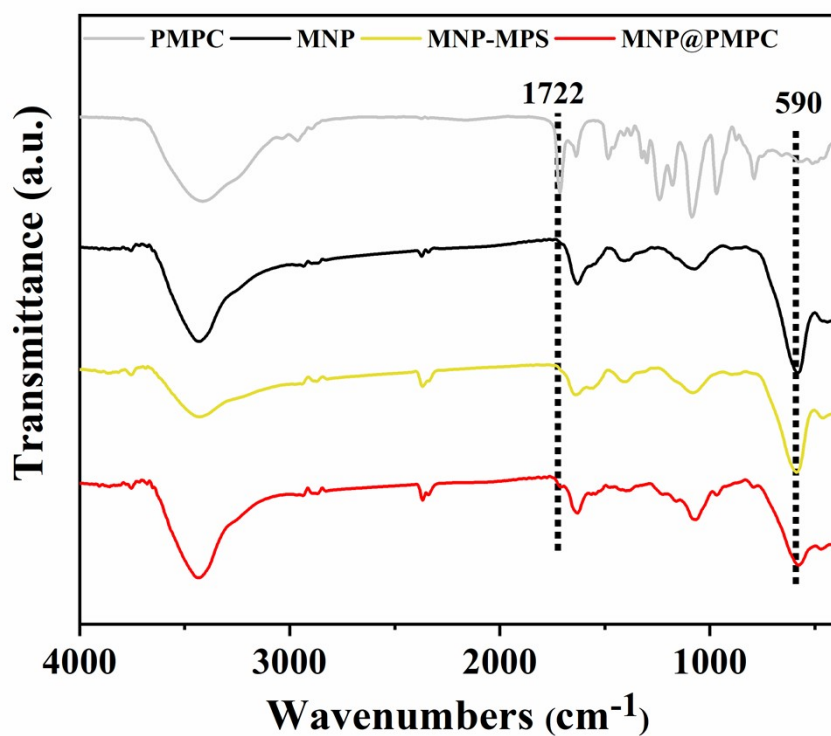

**Figure S1.** The Fourier transform infrared spectra of the PMPC, MNP, MNP-MPS and MNP@PMPC. The peak at  $1722\text{ cm}^{-1}$  belongs to C=O bonds. The peak at  $590\text{ cm}^{-1}$  belongs to Fe-O bond.

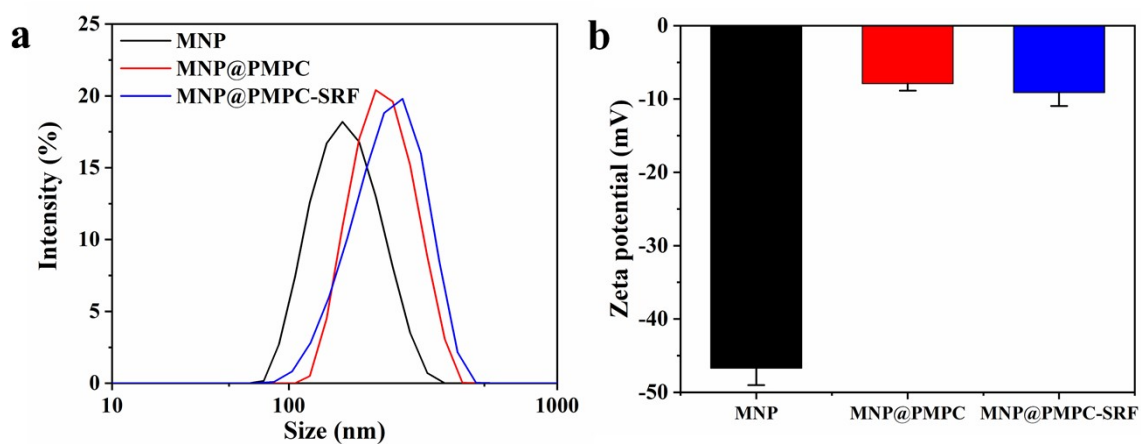

**Figure S2.** The (a) hydrodynamic diameter and (b) surface charge of MNP, MNP@PMPC and MNP@PMPC-SRF dispersed in water.

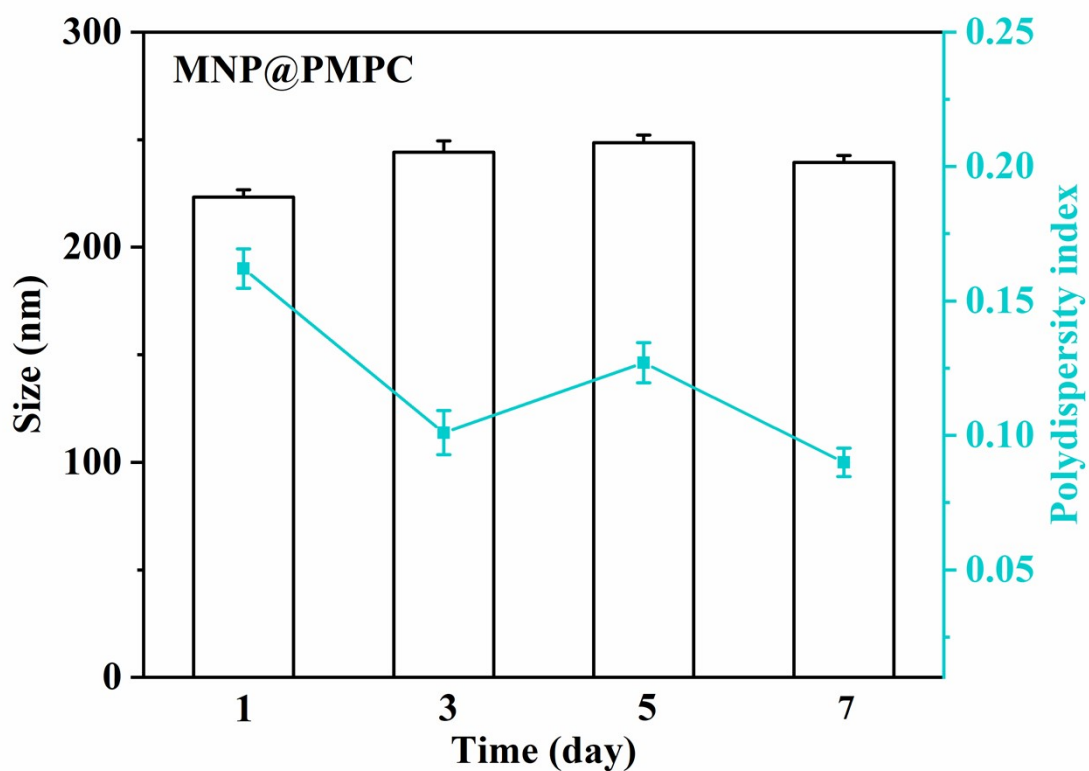

**Figure S3.** The hydrodynamic size and PDI of MNP@PMPC dissolved in water for different time.

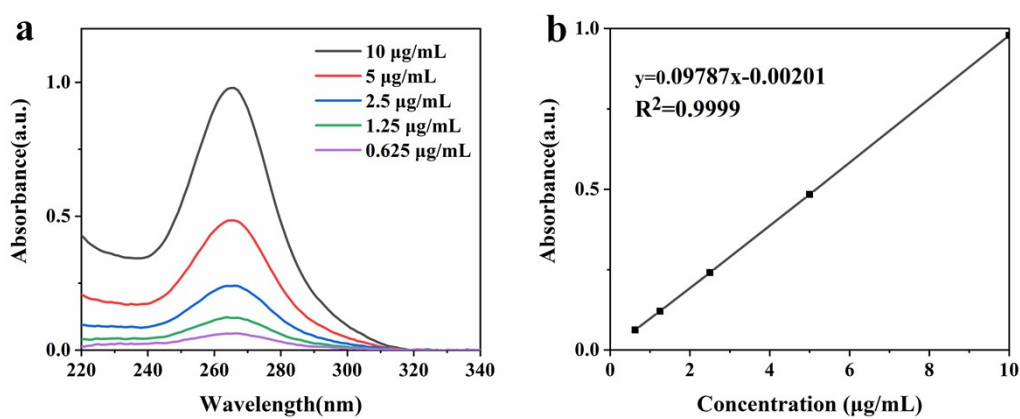

**Figure S4.** The (a) absorbance and (b) standard curve of SRF in mixed solution of EtOH and H<sub>2</sub>O (1:1 v/v).

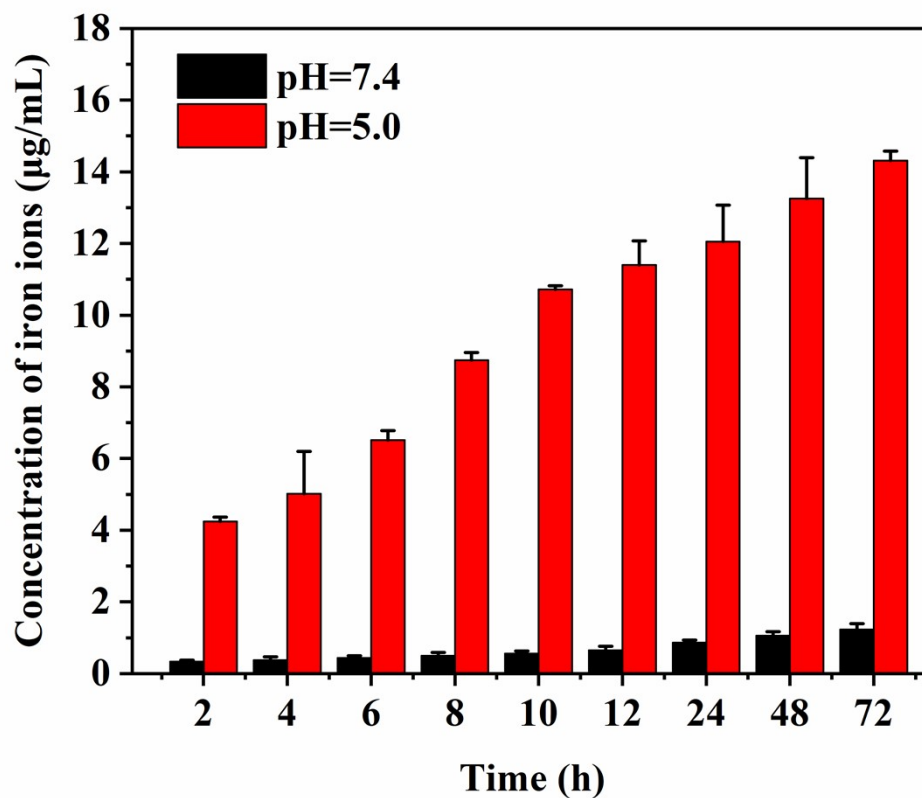

**Figure S5.** The degradation property of MNP dispersed in PBS at pH 5.0 and pH 7.4.

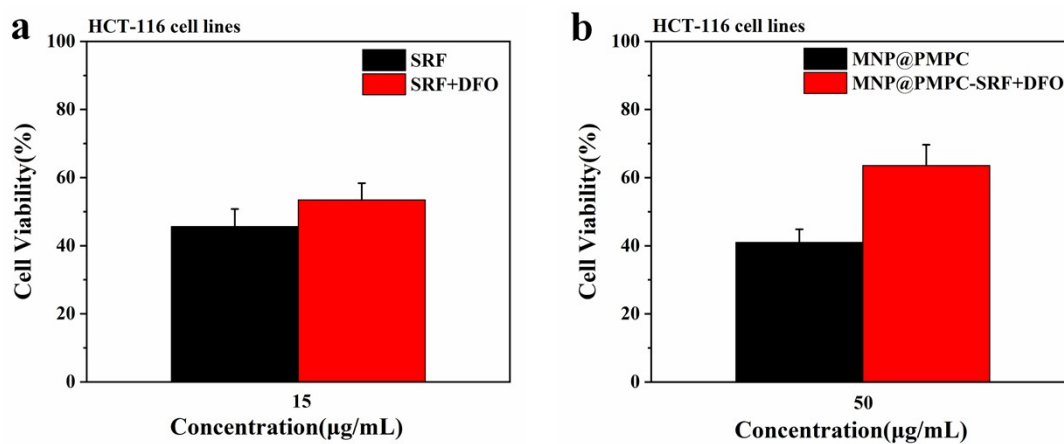

**Figure S6.** Cell viability of HCT-116 cells after 24 h incubation with (a) SRF or SRF + DFO and (b) MNP@PMPC-SRF or MNP@PMPC-SRF + DFO.

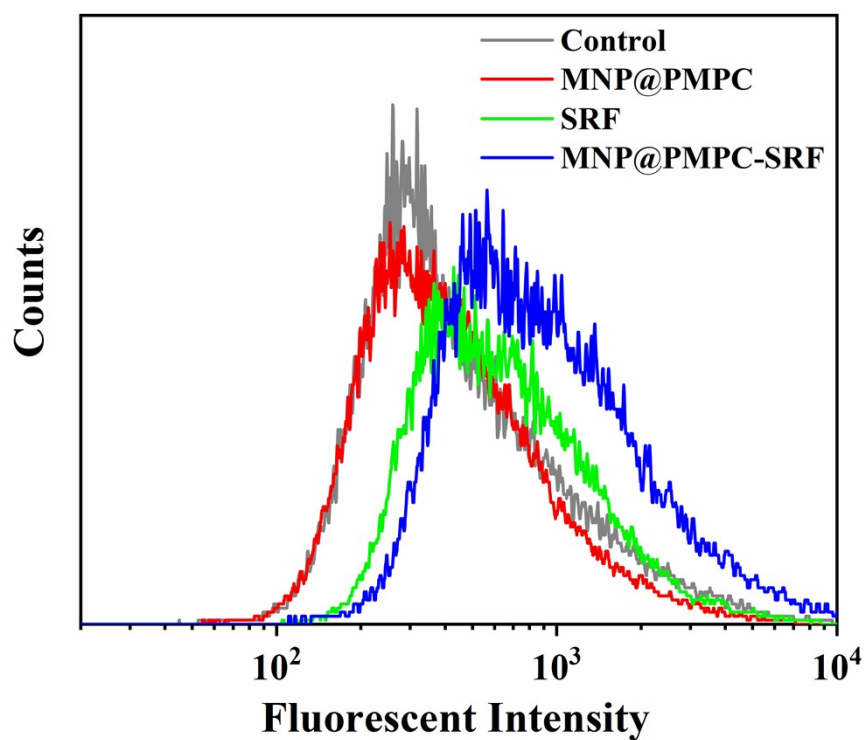

**Figure S7.** Flow cytometry analyses of LPO generation in HCT116 cells detected by C11-BODIPY.

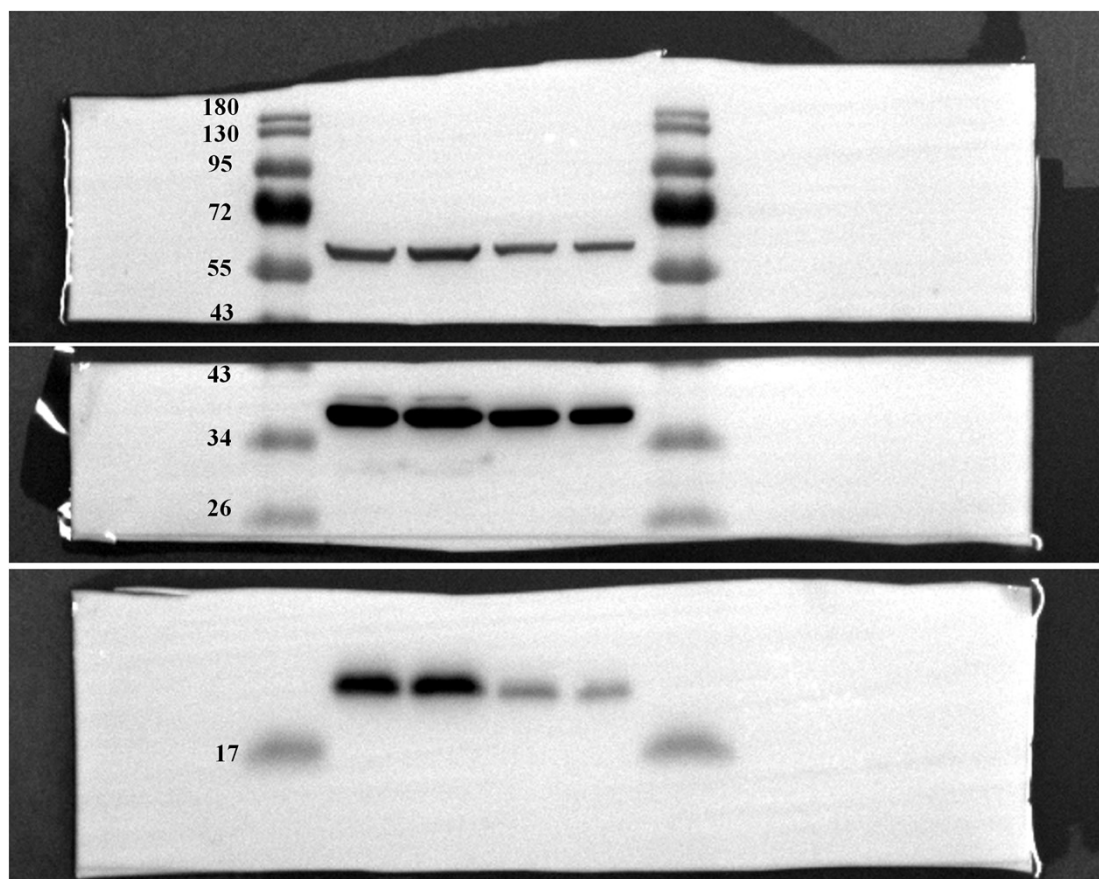

**Figure S8.** Intracellular XcT and GPX4 expression of HCT116 cells treated with different formulations including control, MNP@PMPC, SRF, and MNP@PMPC-SRF (from left to right). Untreated HCT116 cells were taken as a control.

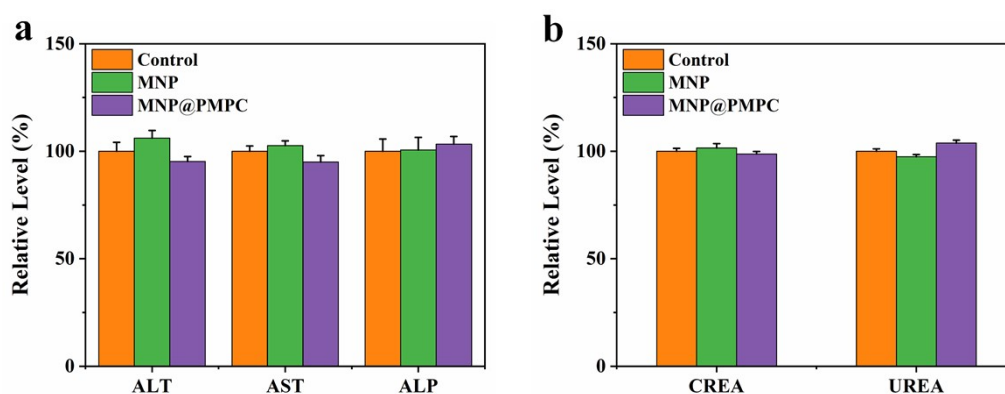

**Figure S9.** Blood biochemistry indices of hepatic and renal function after 24 h injection (alanine aminotransferase (ALT), aspartate aminotransferase (AST), alkaline phosphatase (ALP) (a) creatinine (CREA) and UREA (b) ).

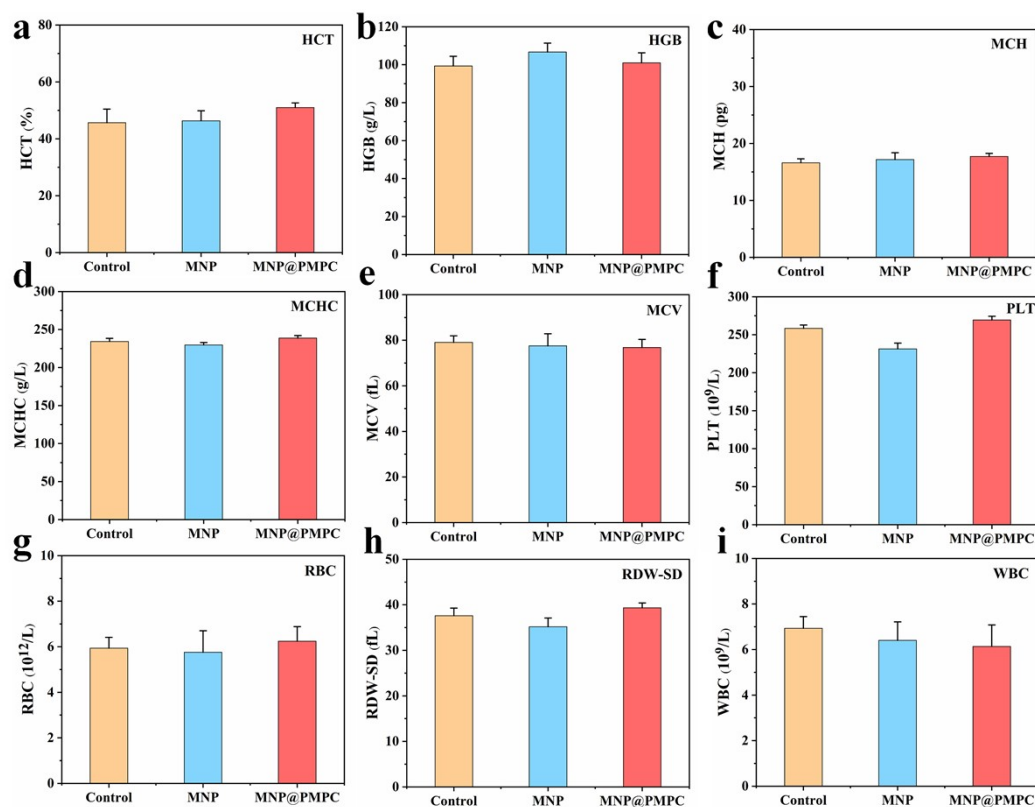

**Figure S10.** Whole blood panel analysis of nanoparticle-treated mice after 24 h injection. (a) HCT, hematocrit; (b) HGB, hemoglobin; (c) MCH, mean corpuscular hemoglobin; (d) MCHC, mean corpuscular hemoglobin concentration; (e) MCV, mean corpuscular volume; (f) PLT, platelets; (g) RBC, red blood cell; (h) RDW-SD, red blood distribution width; (i) WBC, white blood cell.

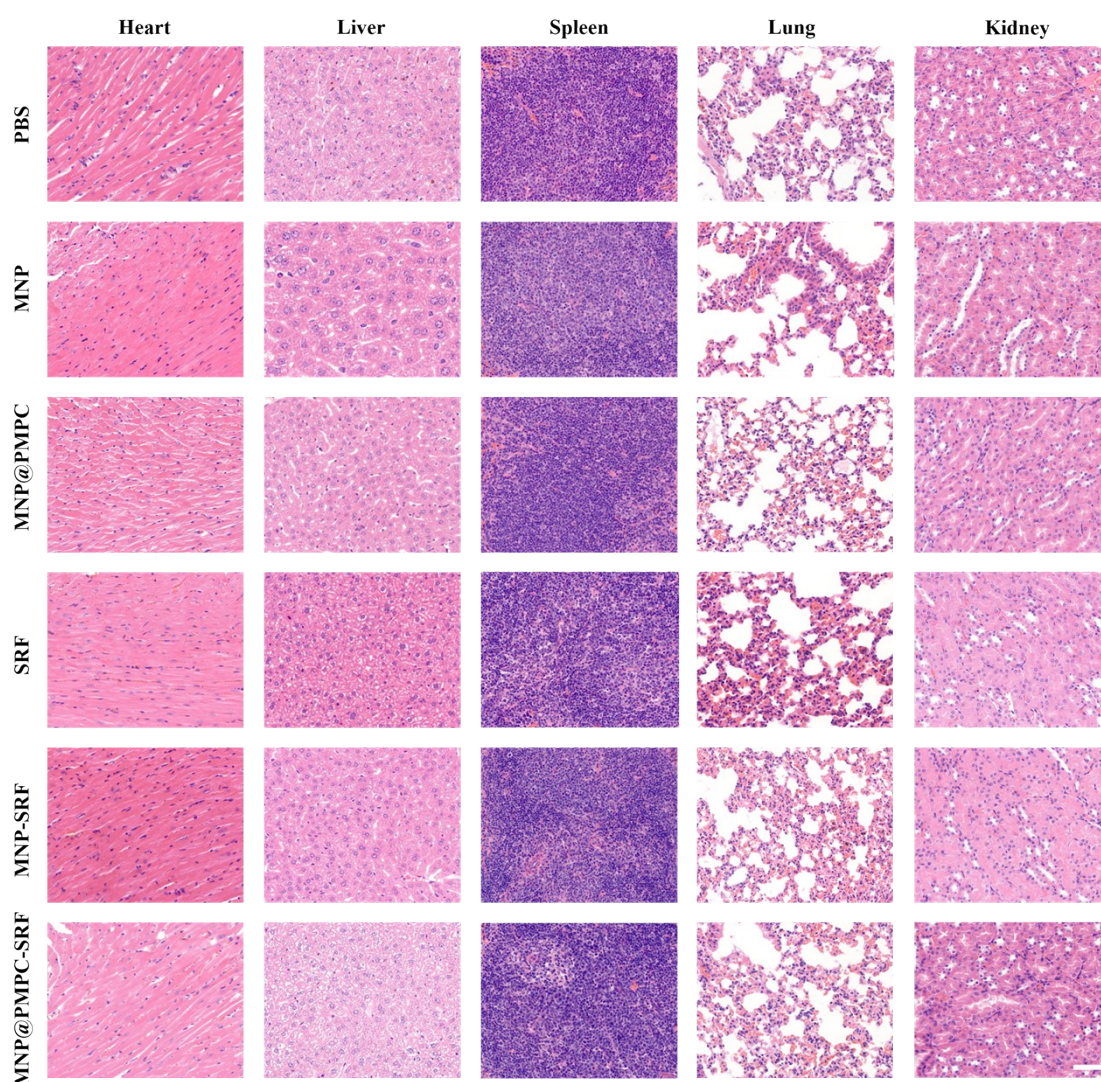

**Figure S11.** H&E-stained slices of major organs including heart, liver, spleen, lungs, and kidneys from each group. The scale bar was 50  $\mu\text{m}$ .
